# Supplementary material
Source: publisher figshare collection journal article supplement (https://wiley.figshare.com/ndownloader/files/5626317)
Supplement: Supplementary file 1 [file 5626317]

Table: Treatment means and standard errors (se) for densities and biomass of community members at the end of the experiment, categorized by taxa
	Absolute Densities									Dry Biomass (mg)
	Treatment									Treatment
Taxa	Control		Small Anax		Medium Anax		Large Anax			Control		Small Anax		Medium Anax		Large Anax
	mean	± se	mean	± se	mean	± se	mean	± se		mean	± se	mean	± se	mean	± se	mean	± se
AMPHIBIA
Bufo nebulifer	62.5	7.37	48.17	5.42	49.33	5.28	65.83	10.13		445.66	58.66	308.8	38.93	322.12	38.88	516.64	89.7
Hyla cinerea	1.5	0.56	2.17	0.65	1.67	0.49	2.33	0.61		144.63	63.73	124.14	36.07	120.65	36.04	231.14	82.9
Hyla versicolor	16.5	4.49	19.17	4.47	9.17	1.82	16.5	2.63		597.9	181.13	658.8	161.92	285.13	62.64	609.31	96.56
Rana clamitans	22.5	2.36	16.33	4.72	21.5	3.04	27.67	1.17		228.7	17.49	160.55	55.98	321.53	88.52	369.13	87.53
GASTROPODA
Physidae	2.33	1.96	0.67	0.42	2	0.93	2.17	0.7		0.24	0.06	0.1	0.02	0.13	0.03	0.29	0.07
Planorbidae	3.33	2.06	0.83	0.31	3.67	1.56	4.83	2.37		0.18	0.06	0.19	0.07	0.28	0.2	0.22	0.03
INSECTA
Coleoptera - adult
Tiny beetles (< 2.0 mm)	32.17	14.22	16.5	5.12	33.17	11.71	39.5	15.02		6.21	2.74	3.18	0.99	6.4	2.26	7.62	2.9
Liodessus or Neobidessus	31	13.87	16.33	5.16	30	10.05	38.5	14.83		5.98	2.68	3.15	0.99	5.79	1.94	7.43	2.86
Othera	1.17	0.48	0.17	0.17	3.17	2.4	1	0.37		0.26	0.1	0.04	0.04	0.7	0.53	0.22	0.08
Small beetles (2.0 - 3.9 mm)	4.83	1.56	3.17	1.56	4	1.98	6.33	2.99		3.88	0.58	2.83	1.36	5.81	2.75	5.95	3.56
Berosus exiguus	2	0.58	1.83	1.01	0.67	0.49	3.67	1.74		0.92	0.27	0.84	0.47	0.31	0.23	1.68	0.8
Hydrochusb	0.5	0.22	0.5	0.34	1.83	0.91	1	0.63		1.31	0.59	1.31	0.9	4.82	2.39	2.63	1.66
Peltodytes floridensis	0.33	0.21	0.17	0.17	0	0	0.5	0.5		0.73	0.46	0.37	0.37	0	0	1.1	1.1
Otherc	2	1.61	0.67	0.33	1.5	0.96	1.17	0.31		3.2	2.58	1.07	0.53	2.4	1.53	1.87	0.49
Medium beetles (4.0 - 7.9 mm)	8.33	1.09	8.33	2.81	12.5	2.79	13.17	3.8		46.4	8.37	30.37	10.23	55.75	12.62	68.88	11.15
Berosus	0.5	0.22	0	0	0.33	0.21	0.5	0.22		2.1	0.94	0	0	1.4	0.89	2.1	0.94
Copelatusd	1.83	0.48	0.67	0.42	2	0.82	2.5	0.56		22.37	5.82	8.13	5.14	24.4	9.96	30.5	6.87
Coptotomus loticus	0.33	0.21	0	0	0	0	0.5	0.34		5.5	3.48	0	0	0	0	8.25	5.64
Hydrocanthus atripennis	0	0	0	0	0.17	0.17	0	0		0	0	0	0	0.48	0.48	0	0
Laccophilus maculosus	5.67	0.88	7.67	2.69	9.67	2.54	9.67	3.86		16.43	2.56	22.23	7.81	28.03	7.36	28.03	11.2
Othere	0	0	0	0	0.33	0.21	0	0		0	0	0	0	1.43	0.91	0	0
Large beetles (8.0 - 10.9 mm)	1.83	0.54	2.33	0.8	1.83	0.48	1.33	0.8		44.95	13.26	52.4	19.24	38.45	10.38	28	17.17
Thermonectus basillaris	0.83	0.31	0.17	0.17	0	0	0	0		23.25	8.57	4.65	4.65	0	0	0	0
Tropisternus blatchleyi	0.5	0.22	0.67	0.49	0.67	0.21	0.33	0.21		9.65	4.32	12.87	9.54	12.87	4.07	6.43	4.07
Tropisternus collaris	0.5	0.34	1.33	0.61	0.83	0.48	0.67	0.49		12.05	8.23	32.13	14.81	20.08	11.5	16.07	11.92
Tropisternus lateralis	0	0	0.17	0.17	0.33	0.33	0.33	0.21		0	0	2.75	2.75	5.5	5.5	5.5	3.48
Extra large beetles (? 11 mm)	0.33	0.21	0.33	0.33	0.17	0.17	0.33	0.21		23.75	15.66	23.75	23.75	9.02	9.02	6.87	6.87
Acilius fraternus	0.17	0.17	0.17	0.17	0	0	0	0		14.73	14.73	14.73	14.73	0	0	0	0
Graphoderus liberus	0	0	0	0	0	0	0.17	0.17		0	0	0	0	0	0	6.87	6.87
Thermonectus nigrofasciatus	0.17	0.17	0.17	0.17	0.17	0.17	0	0		9.02	9.02	9.02	9.02	9.02	9.02	0	0
Coleoptera - larva
Berosus	0.5	0.5	0.17	0.17	0	0	0.67	0.33		1.36	1.36	0.45	0.45	0	0	1.81	0.91
Laccophilus	0.83	0.4	0.67	0.33	0.67	0.49	3.33	1.73		0.19	0.09	0.16	0.08	0.16	0.12	0.78	0.4
Peltodytes	6.67	1.38	6	2.1	5.33	2.06	5.83	2.18		3.52	0.73	3.17	1.11	3.58	1.11	3.08	1.15
Thermonectus	0	0	0	0	0	0	0.67	0.67		0	0	0	0	0	0	1.92	1.92
Tropisternus	2.5	1.96	0.83	0.65	0	0	1.33	1.15		6.8	5.34	2.27	1.78	0	0	3.63	3.11
Diptera
Chironomidae	127	13.25	111.33	20.54	98.5	8.99	126.83	30.16		1.59	0.17	1.39	0.26	1.23	0.11	1.59	0.38
Ephemeropteraf	72	13.4	85.17	7.07	96.33	16.24	66	15.23		1.41	0.59	2.78	1.29	2.6	1.25	0.4	0.17
Hemiptera
Belostoma	1	0.37	2.33	2.14	0.83	0.17	0.83	0.31		96.78	35.66	40.03	25.34	96.67	19.33	96.67	35.65
Nymph	0.17	0.17	2	2	0	0	0	0		0.11	0.11	1.36	1.36	0	0	0	0
Adult	0.83	0.31	0.33	0.21	0.83	0.17	0.83	0.31		96.67	35.65	38.67	24.45	96.67	19.33	96.67	35.65
Buenoa scimitra	12.33	2.81	6.17	0.95	17.83	4.71	12.17	1.99		28.12	5.72	13.74	2.51	40.05	9.82	26.75	5.64
Nymph	0.5	0.34	0.33	0.33	1	0.63	0.83	0.4		0.24	0.18	0.21	0.21	1.1	0.7	0.92	0.44
Adult	11.33	2.28	5.5	1.06	15.83	3.81	10.5	2.4		27.88	5.6	13.53	2.6	38.95	9.37	25.83	5.92
Hesperocorixa nitida	2.17	0.83	1	0.37	1	0.52	3	0.86		20.15	7.75	9.3	3.4	9.3	4.8	27.9	7.96
Notonecta indica	8.83	2.94	14.5	3.54	14.33	7.06	22.5	9.29		81.67	19.53	67.9	13.15	105.16	39.08	131.55	29.11
Nymph	5.17	2.71	11.33	3.56	10.17	6.44	17.83	9.75		17.03	9.52	12.07	4.67	31.71	25.31	49.28	30.7
Adult	3.67	1.09	3.17	0.6	4.17	1.05	4.67	0.84		64.64	19.13	55.83	10.59	73.46	18.44	82.27	14.87
Notonecta irrorata	0.17	0.17	0	0	0.5	0.5	0	0		6.78	6.78	0	0	20.35	20.35	0	0
Pelocoris femoratus	0.17	0.17	0.5	0.34	0	0	0.17	0.17		0.02	0.02	5.72	5.7	0	0	2.85	2.85
Nymph	0.17	0.17	0.17	0.17	0	0	0	0		0.02	0.02	0.02	0.02	0	0	0	0
Adult	0	0	0.33	0.33	0	0	0.17	0.17		0	0	5.7	5.7	0	0	2.85	2.85
Trichocorixa	0	0	0	0	0	0	0.17	0.17		0	0	0	0	0	0	0.12	0.12
Odonata
Coenagrionidaeg	22	3.09	17.33	1.43	21.67	5.78	31.83	6		6.03	1.77	4.5	1.11	7.45	3.52	11	3.85
Lestes australis	0	0	0	0	0.17	0.17	0.17	0.17		0	0	0	0	1.62	1.62	0.87	0.87
Libellulidae	16.17	2.02	16.5	1.67	15.67	1.94	16.67	2.46		126.02	29.82	118.48	17.24	139.33	20.57	177.69	30.62
Erythemis simplicicollis	0	0	0.17	0.17	0	0	0.33	0.21		0	0	0.85	0.85	0	0	1.7	1.07
Ladona deplanata	0	0	0	0	0	0	0	0		0	0	0	0	0	0	0	0
Libellula	0.83	0.31	0.5	0.22	0.67	0.33	0.67	0.21		4.82	1.78	2.89	1.29	2.89	1.97	3.85	1.22
Pachydiplax longipennis	11	0.97	12.67	1.2	11.33	1.38	11.67	1.74		71.69	19.61	85.34	12.31	95.58	14.64	112.65	22.9
Plathemis lydia	3.5	0.89	2.33	0.8	2.5	0.76	3	0.77		44.1	11.15	29.4	10.11	31.5	9.62	37.8	9.76
Tramea carolina	0.83	0.31	0.83	0.31	1.17	0.48	1	0.37		5.42	5.42	0	0	9.36	9.36	21.68	9.85
ZOOPLANKTONh
Calanoida	1	0.63	0.67	0.33	0.83	0.48	0.83	0.54		0.64	0.41	0.43	0.21	0.54	0.31	0.54	0.35
Ceriodaphnia	144.5	91.7	47.17	15.76	73.83	58.11	32.83	12.6		31.81	20.19	10.38	3.47	16.25	12.79	7.23	2.77
Chydorus	34.17	10.51	21.17	6.05	37.5	19.99	53.17	19.66		9.68	2.98	5.99	1.71	10.62	5.66	15.06	5.57
Cladocera - Immature	1.67	0.67	7.67	5.02	2.5	1.34	3.5	3.3		0.12	0.05	0.54	0.35	0.18	0.09	0.25	0.23
Cyclopoida	134.67	20.74	134.5	24.22	94.33	23.97	86	5.65		111.23	17.13	111.1	20.01	77.92	19.8	71.04	4.67
Kurzia	3.67	3.28	0.5	0.5	3.83	1.96	0.33	0.33		2.15	1.92	0.29	0.29	2.25	1.15	0.2	0.2
Macrothrix	32.67	17.04	19.5	5.95	37.33	21.14	20.5	8.93		113.42	59.16	67.7	20.67	129.62	73.39	71.18	31
Nauplii	81.5	34.11	48.17	9.98	23.17	7.19	28.17	4.64		6.39	2.67	3.78	0.78	1.82	0.56	2.21	0.36
Ostracoda	37	18.69	9.33	2.08	15.67	3.88	14.67	3.54		6.22	3.14	1.57	0.35	2.63	0.65	2.46	0.59
Pleuroxus	0.67	0.21	4	2.29	1.5	1.31	0.33	0.21		0.2	0.06	1.2	0.69	0.45	0.39	0.1	0.06
Scapholeberis	6.67	2.99	0.83	0.4	3	1.61	1.33	0.67		3.42	1.53	0.43	0.21	1.54	0.83	0.68	0.34
Simocephalus	14.67	8.42	19.83	7.31	11.33	4.81	25.67	8.95		80.62	46.29	109.02	40.2	62.3	26.46	141.09	49.2
aParacymus confusus, Desmopachria sp., and many others
bat least two species
cEnochus blatchleyi and others
dat least two species (C. glyphicus and C. debilis)
emultiple unidentified species
fmostly Callibaetis sp. but also some Caenis sp.
gIschnura posita, I. hastata, and Enallagma aspersum
hZooplankton densities indicate densities within samples and need to be multiplied by factor of 320 to scale densities up to total tank volume
